# Supplementary material
Source: PubMed Central journal article supplement (PMC2725515)

**Supplemental Figure 2. Construction of allelic exchange plasmid for deletion of *flaFBA* by TOPO TA cloning and subcloning.** The 0.5-kb upstream (U) and downstream (D) sequences flanking the *flaF*, *flaB*, and *flaA* genes were PCR amplified (Step 1) and cloned into pCR2.1-TOPO by TOPO TA cloning (Step 2) yielding plasmids pGTR1092 and pGTR1093, respectively. The upstream flanking sequence from pGTR1092 was excised using *Sall* and *NotI* and was cloned into pGTR1093 that had been digested with *XhoI* and *NotI*, yielding pGTR1106 (Step 3). The joined upstream and downstream sequences ( $\Delta$ *flaFBA*) were excised from pGTR1106 on an *SstI*-*XbaI* fragment and were cloned into pCVD442 that had been digested with *SstI* and *XbaI*, yielding pGTR1108 (Step 4). A chloramphenicol resistance gene (*cat*) on a *NotI* fragment was inserted into the *NotI* site between the upstream and downstream sequences of pGTR1108, yielding pGTR1120 encoding  $\Delta$ *flaFBA*::*cat* (Step 5). pGTR1120 was subsequently used to recombine the  $\Delta$ *flaFBA*::*cat* mutation into the *V. vulnificus* CMCP6 genome by the two-step *sacB*-assisted allelic exchange method.

U *flaF, flaB, flaA* D

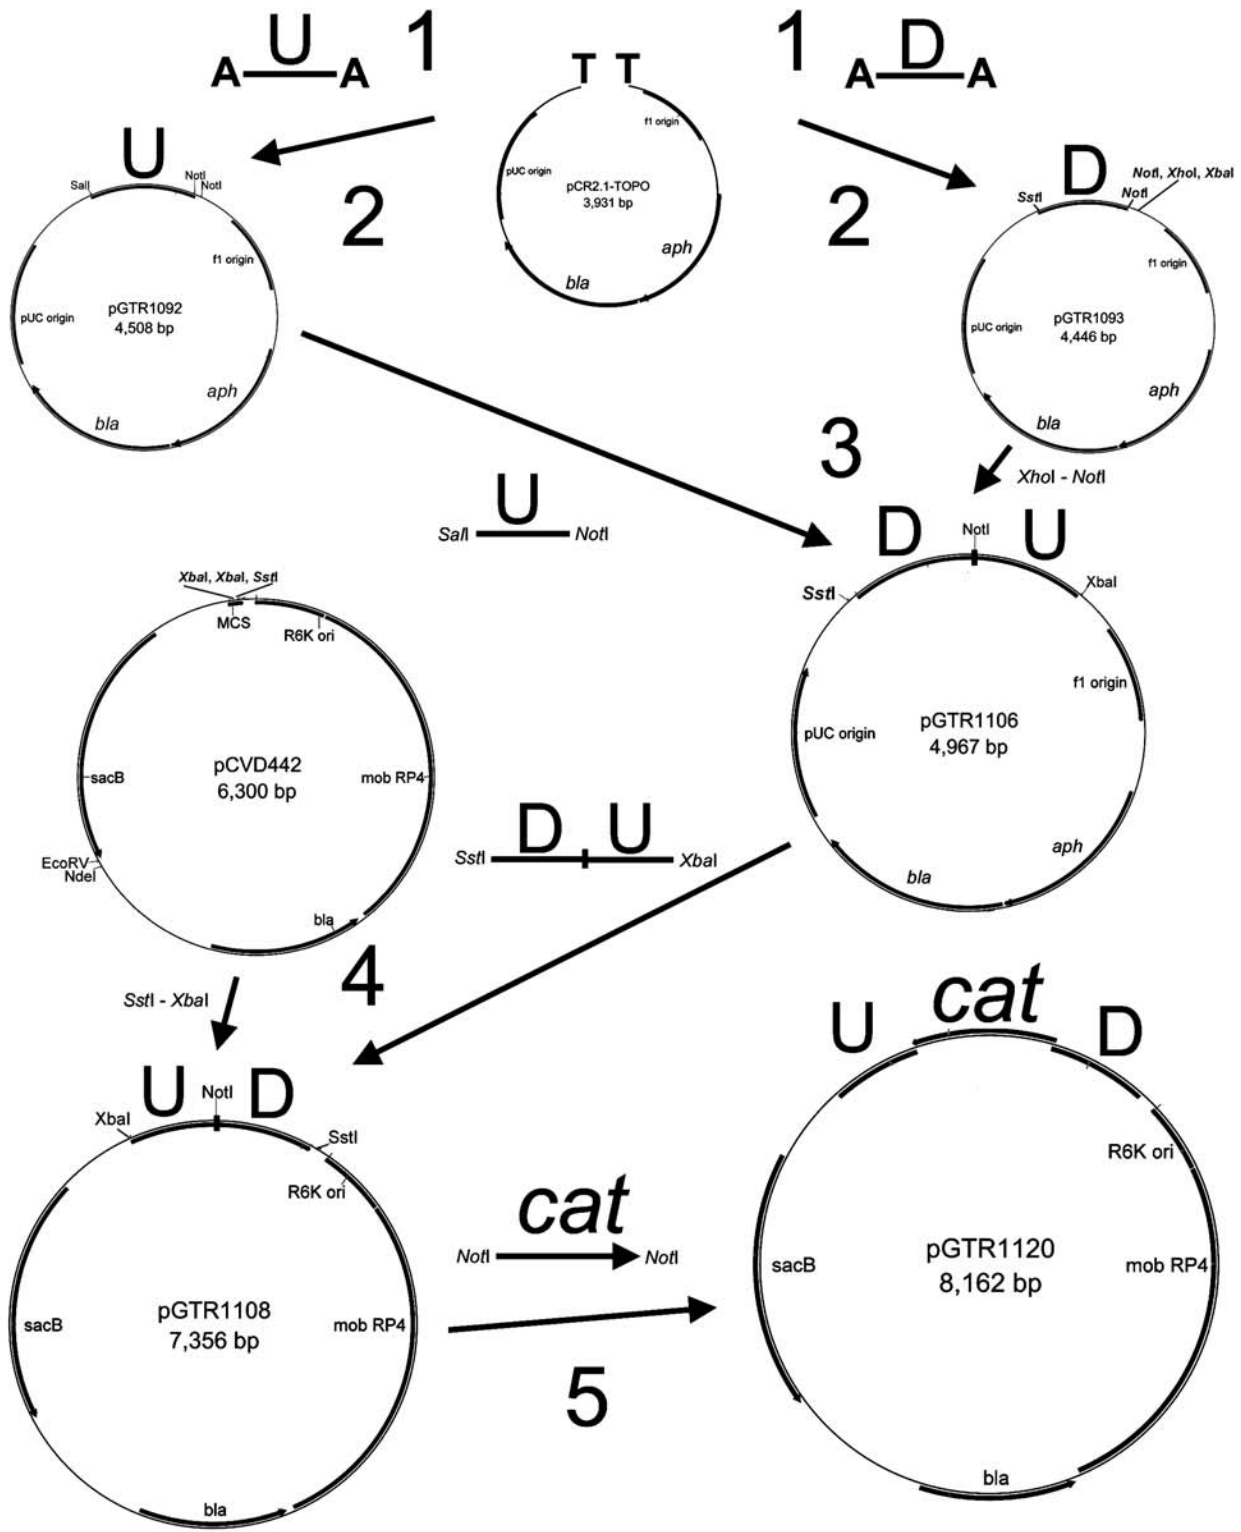

Supplement: supp_75_15_4936__2.pdf [file supp_75_15_4936__2.pdf]
